# Supplementary material for: Photochemistry of acetylacetone isolated in parahydrogen matrices upon 266 nm irradiation
Source: Royal Society of Chemistry journal article supplement (doi:10.1039/c2cp23913b), 2012-01-01
Supplement: c2cp23913b.pdf [file c2cp23913b.pdf]

## Supplementary Data

### Photochemistry of Acetylacetone isolated in parahydrogen matrices upon 266 nm irradiation.

Rolando R. Lozada-Garcia, Justinas Ceponkus, Michèle Chevalier, Wutharath Chin, Jean-Michel Mestdagh and Claudine Crépin

**Table S1** : Harmonic , anharmonic frequencies (cm-1) and harmonic intensities (km/mol) of XYZ (X,Y,Z =C or T) isomers

| CCC        |          |          | CCT        |          |          |
|------------|----------|----------|------------|----------|----------|
| Anharmonic | Harmonic | IR-Inten | Anharmonic | Harmonic | IR-Inten |
| -185.8     | 30.4     | 0.1      | 54.8       | 60.9     | 3.6      |
| 115.8      | 119.4    | 1.2      | 91.6       | 103.9    | 0.3      |
| 144.0      | 149.5    | 0.0      | 138.2      | 141.2    | 2.1      |
| 175.2      | 182.4    | 0.0      | 175.3      | 174.0    | 3.6      |
| 230.1      | 232.5    | 3.3      | 184.7      | 193.2    | 1.7      |
| 365.9      | 373.6    | 7.1      | 344.4      | 341.3    | 0.2      |
| 403.6      | 398.0    | 2.5      | 374.1      | 375.1    | 5.0      |
| 512.1      | 513.3    | 11.2     | 387.2      | 416.3    | 80.4     |
| 560.7      | 559.9    | 0.4      | 485.3      | 485.2    | 15.4     |
| 635.1      | 648.3    | 12.7     | 536.1      | 538.6    | 4.8      |
| 642.9      | 652.4    | 0.3      | 622.0      | 632.8    | 12.3     |
| 773.8      | 794.8    | 31.7     | 637.3      | 647.6    | 0.7      |
| 910.6      | 918.1    | 36.6     | 806.0      | 820.9    | 24.6     |
| 930.7      | 944.0    | 2.5      | 872.1      | 884.7    | 76.5     |
| 992.1      | 1008.6   | 64.9     | 895.9      | 914.2    | 2.7      |
| 996.4      | 1010.5   | 14.5     | 973.0      | 991.6    | 22.7     |
| 1014.0     | 1035.1   | 10.2     | 1018.2     | 1036.5   | 1.2      |
| 1022.8     | 1047.4   | 7.8      | 1016.4     | 1038.7   | 5.7      |
| 1178.2     | 1063.5   | 1.1      | 1041.5     | 1065.7   | 1.6      |
| 1171.3     | 1194.6   | 16.1     | 1159.8     | 1189.7   | 5.0      |
| 1239.9     | 1271.2   | 141.6    | 1164.0     | 1197.3   | 83.8     |
| 1298.3     | 1376.7   | 83.9     | 1265.6     | 1304.1   | 293.4    |
| 1357.3     | 1391.5   | 64.3     | 1349.0     | 1381.0   | 49.6     |
| 1372.1     | 1412.3   | 12.7     | 1381.4     | 1411.5   | 0.1      |
| 1421.9     | 1459.8   | 130.8    | 1392.8     | 1426.3   | 35.3     |
| 1431.2     | 1471.4   | 14.3     | 1436.0     | 1467.9   | 13.0     |
| 1434.5     | 1472.4   | 9.8      | 1452.2     | 1477.5   | 9.6      |
| 1429.1     | 1477.2   | 6.5      | 1450.1     | 1481.8   | 5.4      |
| 1456.0     | 1491.6   | 60.7     | 1465.3     | 1487.1   | 10.0     |
| 1608.7     | 1646.1   | 268.9    | 1628.2     | 1673.0   | 420.1    |
| 1624.0     | 1677.0   | 372.1    | 1723.3     | 1759.6   | 173.5    |
| 2361.6     | 3006.6   | 358.4    | 2909.2     | 3015.2   | 22.6     |
| 2918.0     | 3034.3   | 5.3      | 2947.1     | 3025.8   | 5.2      |
| 2928.9     | 3038.3   | 17.4     | 2921.4     | 3061.6   | 9.8      |
| 2965.1     | 3088.0   | 6.5      | 2940.4     | 3079.2   | 11.0     |
| 2947.7     | 3090.2   | 4.8      | 2994.0     | 3135.5   | 6.8      |
| 3035.3     | 3138.0   | 9.2      | 2997.7     | 3141.2   | 11.8     |
| 3003.2     | 3143.0   | 12.1     | 3058.3     | 3188.7   | 6.5      |
| 3094.3     | 3211.8   | 3.1      | 3629.7     | 3817.6   | 79.0     |

| CTC        |          |          |
|------------|----------|----------|
| Anharmonic | Harmonic | IR-Inten |
| 56.5       | 58.5     | 1.4      |
| 83.7       | 98.7     | 0.1      |
| 95.0       | 105.2    | 1.3      |
| 170.0      | 171.7    | 0.4      |
| 226.1      | 213.6    | 3.2      |
| 347.6      | 341.6    | 1.7      |
| 395.9      | 396.8    | 1.5      |
| 486.1      | 485.2    | 12.5     |
| 469.2      | 496.3    | 79.0     |
| 535.2      | 545.8    | 9.9      |
| 593.5      | 599.4    | 0.2      |
| 623.0      | 632.3    | 40.1     |
| 819.3      | 838.5    | 38.2     |
| 831.5      | 844.6    | 10.4     |
| 932.1      | 950.1    | 70.5     |
| 967.1      | 987.1    | 15.0     |
| 1012.6     | 1029.6   | 60.5     |
| 1015.4     | 1039.9   | 3.9      |
| 1043.6     | 1071.4   | 0.5      |
| 1149.3     | 1180.8   | 214.7    |
| 1199.6     | 1225.0   | 41.5     |
| 1264.7     | 1300.5   | 30.3     |
| 1347.5     | 1383.4   | 20.4     |
| 1370.1     | 1398.9   | 24.9     |
| 1418.6     | 1455.5   | 6.6      |
| 1421.8     | 1461.0   | 95.2     |
| 1430.2     | 1471.7   | 17.8     |
| 1441.9     | 1477.9   | 8.3      |
| 1440.8     | 1492.7   | 7.9      |
| 1588.9     | 1640.0   | 580.0    |
| 1707.4     | 1743.4   | 167.9    |
| 2920.5     | 3027.5   | 4.2      |
| 2923.5     | 3034.5   | 16.1     |
| 2939.6     | 3081.1   | 6.0      |
| 2938.2     | 3081.9   | 10.3     |
| 3019.6     | 3130.0   | 15.3     |
| 3002.1     | 3143.5   | 12.1     |
| 3028.7     | 3176.7   | 6.1      |
| 3606.5     | 3791.0   | 43.8     |

| CTT        |          |          |
|------------|----------|----------|
| Anharmonic | Harmonic | IR-Inten |
| 62.1       | 63.1     | 9.0      |
| 80.7       | 102.5    | 0.1      |
| 126.4      | 131.3    | 0.1      |
| 172.2      | 174.6    | 0.2      |
| 218.8      | 215.2    | 10.7     |
| 351.5      | 344.0    | 2.3      |
| 396.9      | 397.3    | 1.0      |
| 382.8      | 404.4    | 91.2     |
| 483.8      | 480.7    | 5.5      |
| 530.0      | 531.4    | 8.0      |
| 594.4      | 601.6    | 1.3      |
| 622.8      | 633.5    | 38.6     |
| 828.9      | 840.5    | 13.4     |
| 853.7      | 873.7    | 19.8     |
| 934.0      | 949.4    | 104.6    |
| 965.1      | 982.9    | 5.4      |
| 1007.5     | 1026.4   | 11.3     |
| 1015.7     | 1040.4   | 5.1      |
| 1044.1     | 1071.7   | 0.5      |
| 1148.1     | 1176.8   | 138.2    |
| 1200.0     | 1228.7   | 147.3    |
| 1260.6     | 1297.8   | 22.1     |
| 1350.4     | 1383.2   | 19.6     |
| 1368.7     | 1399.1   | 36.4     |
| 1397.6     | 1433.3   | 223.3    |
| 1416.8     | 1461.2   | 23.5     |
| 1424.1     | 1468.1   | 9.3      |
| 1424.5     | 1476.9   | 8.0      |
| 1450.3     | 1501.5   | 7.0      |
| 1617.1     | 1662.8   | 403.5    |
| 1710.9     | 1745.5   | 188.6    |
| 2913.9     | 3011.9   | 31.0     |
| 2919.9     | 3028.5   | 3.5      |
| 2918.0     | 3058.6   | 10.5     |
| 2939.9     | 3082.1   | 9.1      |
| 2999.1     | 3142.9   | 11.1     |
| 3019.5     | 3159.9   | 10.3     |
| 3042.4     | 3175.2   | 4.7      |
| 3629.3     | 3818.6   | 83.7     |

| TCC        |          |          |
|------------|----------|----------|
| Anharmonic | Harmonic | IR-Inten |
| 63.3       | 72.6     | 3.5      |
| 133.6      | 137.9    | 0.1      |
| 168.6      | 181.9    | 2.4      |
| 207.2      | 214.9    | 2.9      |
| 214.3      | 245.9    | 1.4      |
| 338.6      | 344.8    | 1.9      |
| 386.9      | 389.3    | 3.6      |
| 452.9      | 493.7    | 67.3     |
| 531.0      | 534.6    | 18.3     |
| 537.7      | 547.2    | 2.0      |
| 615.6      | 604.4    | 2.9      |
| 614.4      | 630.8    | 5.2      |
| 782.1      | 799.3    | 5.0      |
| 836.3      | 857.5    | 16.4     |
| 916.0      | 938.0    | 19.6     |
| 977.8      | 994.3    | 32.4     |
| 1015.3     | 1036.4   | 28.0     |
| 1014.0     | 1040.0   | 5.6      |
| 1040.8     | 1067.9   | 1.8      |
| 1116.9     | 1145.1   | 74.9     |
| 1245.6     | 1278.9   | 123.6    |
| 1282.6     | 1319.5   | 45.2     |
| 1345.0     | 1378.6   | 63.5     |
| 1357.1     | 1394.9   | 49.6     |
| 1394.9     | 1427.0   | 47.4     |
| 1434.8     | 1473.7   | 8.3      |
| 1442.3     | 1482.8   | 25.7     |
| 2095.3     | 1488.3   | 6.6      |
| 1448.8     | 1496.2   | 8.8      |
| 1624.3     | 1669.2   | 389.3    |
| 1684.1     | 1718.7   | 237.0    |
| 2960.4     | 3004.5   | 8.9      |
| 2930.4     | 3036.0   | 11.2     |
| 2924.8     | 3063.5   | 7.3      |
| 2943.1     | 3084.9   | 6.3      |
| 2987.2     | 3134.6   | 5.5      |
| 3000.4     | 3145.0   | 6.9      |
| 3063.3     | 3196.8   | 2.2      |
| 3604.9     | 3803.8   | 86.2     |

| TCT        |          |          |
|------------|----------|----------|
| Anharmonic | Harmonic | IR-Inten |
| 63.3       | 67.7     | 4.0      |
| 142.9      | 144.6    | 1.6      |
| 151.4      | 177.9    | 0.0      |
| 191.4      | 198.9    | 1.9      |
| 196.0      | 200.8    | 3.8      |
| 332.0      | 342.6    | 0.5      |
| 333.5      | 365.7    | 82.1     |
| 379.9      | 383.4    | 2.5      |
| 534.7      | 533.5    | 8.5      |
| 533.4      | 536.9    | 4.2      |
| 589.5      | 595.5    | 9.8      |
| 619.0      | 626.6    | 1.0      |
| 795.4      | 809.8    | 11.4     |
| 843.2      | 861.8    | 24.4     |
| 910.9      | 926.4    | 55.3     |
| 986.8      | 1008.3   | 41.9     |
| 1016.6     | 1035.5   | 0.5      |
| 1026.1     | 1047.6   | 7.1      |
| 1041.1     | 1067.3   | 1.1      |
| 1120.8     | 1163.0   | 10.6     |
| 1239.0     | 1277.8   | 141.3    |
| 1266.8     | 1300.8   | 172.0    |
| 1342.1     | 1380.3   | 65.3     |
| 1360.2     | 1394.6   | 49.7     |
| 1384.1     | 1418.6   | 28.0     |
| 1421.6     | 1462.3   | 24.1     |
| 1431.5     | 1475.9   | 8.4      |
| 1443.7     | 1482.1   | 8.8      |
| 1444.8     | 1483.8   | 2.2      |
| 1671.7     | 1708.8   | 391.4    |
| 1686.6     | 1719.7   | 111.9    |
| 2918.6     | 3013.3   | 23.3     |
| 2933.4     | 3042.3   | 2.8      |
| 2918.4     | 3058.7   | 10.6     |
| 2958.9     | 3100.2   | 7.2      |
| 3002.9     | 3138.8   | 5.2      |
| 2998.3     | 3142.4   | 12.7     |
| 3063.9     | 3197.6   | 3.1      |
| 3644.3     | 3832.1   | 89.1     |

| TTC        |          |          |
|------------|----------|----------|
| Anharmonic | Harmonic | IR-Inten |
| 97.1       | 50.0     | 3.7      |
| 236.5      | 76.6     | 0.3      |
| 179.2      | 181.0    | 0.8      |
| 237.4      | 228.3    | 6.4      |
| 213.7      | 228.8    | 0.7      |
| 323.0      | 324.1    | 6.1      |
| 410.7      | 409.5    | 10.3     |
| 479.4      | 497.5    | 87.8     |
| 528.4      | 535.0    | 3.2      |
| 546.9      | 550.1    | 1.3      |
| 586.2      | 586.2    | 21.8     |
| 575.8      | 591.8    | 2.1      |
| 775.7      | 790.2    | 1.3      |
| 846.2      | 881.7    | 34.8     |
| 885.2      | 909.5    | 20.5     |
| 1008.5     | 1018.5   | 49.3     |
| 1010.3     | 1025.2   | 1.5      |
| 1018.9     | 1046.5   | 4.9      |
| 1040.2     | 1065.2   | 0.2      |
| 1193.1     | 1214.0   | 220.9    |
| 1225.9     | 1253.0   | 138.2    |
| 1264.3     | 1295.7   | 80.8     |
| 1347.9     | 1390.1   | 34.0     |
| 1375.5     | 1401.9   | 3.7      |
| 1408.5     | 1444.2   | 13.4     |
| 1428.9     | 1469.3   | 3.1      |
| 1413.8     | 1474.0   | 14.2     |
| 1457.7     | 1487.1   | 38.0     |
| 1446.2     | 1494.6   | 1.6      |
| 1634.0     | 1673.9   | 426.8    |
| 1683.3     | 1709.1   | 192.1    |
| 2928.0     | 3037.3   | 5.7      |
| 2938.0     | 3043.0   | 11.7     |
| 2947.7     | 3086.6   | 5.3      |
| 2957.6     | 3098.1   | 7.6      |
| 2974.3     | 3128.0   | 13.3     |
| 2990.0     | 3140.3   | 9.9      |
| 3073.0     | 3204.2   | 2.6      |
| 3607.8     | 3795.6   | 49.9     |

| TTT        |          |          |
|------------|----------|----------|
| Anharmonic | Harmonic | IR-Inten |
| 61.6       | 48.4     | 0.1      |
| 139.5      | 110.9    | 0.4      |
| 187.1      | 187.3    | 0.3      |
| 225.9      | 230.6    | 0.6      |
| 237.8      | 237.6    | 0.0      |
| 328.3      | 323.2    | 6.7      |
| 369.8      | 350.4    | 90.9     |
| 409.8      | 412.3    | 1.6      |
| 528.7      | 527.0    | 4.8      |
| 545.9      | 546.2    | 9.1      |
| 585.5      | 585.8    | 30.5     |
| 581.4      | 588.3    | 4.5      |
| 771.0      | 784.5    | 1.1      |
| 884.9      | 899.9    | 53.9     |
| 890.5      | 911.9    | 19.5     |
| 1000.0     | 1017.0   | 4.0      |
| 1007.1     | 1024.7   | 2.4      |
| 1023.8     | 1045.3   | 6.3      |
| 1039.3     | 1064.7   | 0.0      |
| 1180.2     | 1210.0   | 219.6    |
| 1215.3     | 1245.2   | 90.3     |
| 1261.7     | 1297.4   | 70.8     |
| 1354.0     | 1387.2   | 39.4     |
| 1358.2     | 1394.0   | 125.0    |
| 1387.5     | 1423.7   | 59.2     |
| 1429.6     | 1470.3   | 4.1      |
| 1435.9     | 1479.5   | 14.6     |
| 1462.1     | 1489.9   | 14.8     |
| 1461.0     | 1500.6   | 0.2      |
| 1652.6     | 1699.7   | 426.8    |
| 1684.3     | 1710.6   | 94.2     |
| 2945.8     | 3017.8   | 23.4     |
| 2936.4     | 3034.2   | 7.5      |
| 2921.7     | 3060.1   | 8.7      |
| 2960.1     | 3094.9   | 9.0      |
| 2997.5     | 3138.6   | 10.5     |
| 3060.2     | 3174.8   | 1.9      |
| 3053.4     | 3198.2   | 2.1      |
| 3648.5     | 3830.0   | 88.5     |
